# Supplementary material for: Success and Limitation of Equine Influenza Vaccination: The First Incursion in a Decade of a Florida Clade 1 Equine Influenza Virus that Shakes Protection Despite High Vaccine Coverage
Source: MDPI journal article supplement (doi:10.3390/vaccines7040174), 2019-11-02
Supplement: s1 [file s1]

# Success and limitation of equine influenza vaccination: the first incursion in a decade of a Florida Clade 1 equine influenza virus that shakes protection despite high vaccine coverage.

Stéphanie Fougerolle, Christine Fortier, Loïc Legrand, Marion Jourdan, Christel Marcillaud-Pitel, Stéphane Pronost and Romain Paillot.

**Supplementary Table S1:** SRH antibody titres of serum samples (collected between September 2017 to February 2018).

| Region               | Categories |      |                               |             |      |                               |           |      |                               |      |      |                               | Overall |      |                               |
|----------------------|------------|------|-------------------------------|-------------|------|-------------------------------|-----------|------|-------------------------------|------|------|-------------------------------|---------|------|-------------------------------|
|                      | Breeding   |      |                               | Exportation |      |                               | Diagnosis |      |                               | Sale |      |                               |         |      |                               |
|                      | N          | %    | Average ±<br>STDV<br>(median) | N           | %    | Average ±<br>STDV<br>(median) | N         | %    | Average ±<br>STDV<br>(median) | N    | %    | Average ±<br>STDV<br>(median) | N       | %    | Average ±<br>STDV<br>(median) |
| Normandy             | 474        |      |                               | 416         |      |                               | 474       |      |                               | 473  |      |                               | 1837    |      |                               |
| SRH=0mm²             | 12         | 2.5  |                               | 6           | 1.4  |                               | 33        | 7    |                               | 81   | 17.1 |                               | 132     | 7.2  |                               |
| SRH<85mm² ≠<br>0mm²  | 11         | 2.3  | 57.3 ± 15.5<br>(58.9)         | 9           | 2.1  | 48.3 ± 17.9<br>(46)           | 31        | 6.5  | 57.6 ± 18.8<br>(56.5)         | 40   | 8.5  | 56.8 ± 16.7<br>(56.1)         | 91      | 4.4  | 56.3 ± 17.4<br>(56.4)         |
| SRH≥85mm²<br><155mm² | 115        | 24.3 | 132.9 ± 16.5<br>(135.7)       | 116         | 27.6 | 128.7 ± 19.9<br>(134.3)       | 116       | 24.5 | 126.3 ± 20.2<br>(128.4)       | 123  | 26   | 124.6 ± 17.4<br>(127.2)       | 470     | 25.6 | 128.2 ± 18.7<br>(131.3)       |
| SRH≥155mm²           | 336        | 70.9 | 194.7 ± 26.4<br>(191.7)       | 285         | 68.8 | 192.7 ± 28<br>(187.2)         | 294       | 62   | 197.8 ± 29<br>(193)           | 229  | 48.4 | 195.9 ± 30.3<br>(189.5)       | 1144    | 62.3 | 195.2 ± 28.3<br>(190.7)       |
| Pays de Loire        | 95         |      |                               | 36          |      |                               | 93        |      |                               | 45   |      |                               | 269     |      |                               |
| SRH=0mm²             | 1          | 1.1  |                               | 11          | 30.6 |                               | 10        | 10.8 |                               | 6    | 13.3 |                               | 28      | 10.4 |                               |
| SRH<85mm² ≠<br>0mm²  | 1          | 1.1  | 80.3 ± //<br>(80.3)           | 2           | 5.6  | 53.7 ± 9.7<br>(53.7)          | 8         | 8.6  | 56.9 ± 10.9<br>(59.5)         | 4    | 8.9  | 50.2 ± 18.9<br>(49.1)         | 15      | 5.6  | 56.2 ± 14<br>(59.6)           |
| SRH≥85mm²<br><155mm² | 32         | 33.7 | 135.9 ± 17.6<br>(139.7)       | 7           | 19.4 | 144.2 ± 7.3<br>(144.6)        | 27        | 29   | 126 ± 20.6<br>(126.7)         | 16   | 35.6 | 122 ± 19.8<br>(124.4)         | 82      | 30.5 | 130.6 ± 19.5<br>(135.9)       |
| SRH≥155mm²           | 61         | 64.2 | 193.1 ± 26.6<br>(185.8)       | 16          | 44.4 | 183.4 ± 22.5<br>(179.6)       | 48        | 51.6 | 202 ± 31.3<br>(201.4)         | 19   | 42.2 | 201.9 ± 26.5<br>(201.6)       | 144     | 53.5 | 196.4 ± 28.3<br>(191.4)       |

|                                           |     |      |                         |     |      |                         |     |      |                         |     |      |                         |      |      |                         |
|-------------------------------------------|-----|------|-------------------------|-----|------|-------------------------|-----|------|-------------------------|-----|------|-------------------------|------|------|-------------------------|
| Rhône-Alpes                               | 138 |      |                         | 5   |      |                         | 95  |      |                         | 2   |      |                         | 240  |      |                         |
| SRH=0mm <sup>2</sup>                      | 3   | 2.2  |                         | 0   | 0.0  | /                       | 6   | 6.3  |                         | 1   | 50.0 |                         | 10   | 4.2  |                         |
| SRH<85mm <sup>2</sup> ≠ 0mm <sup>2</sup>  | 6   | 4.3  | 70.4 ± 15.8<br>(76)     | 0   | 0.0  | /                       | 5   | 5.3  | 66.4 ± 11.3<br>(62.5)   | 0   | 0.0  | /                       | 11   | 4.6  | 68.6 ± 13.4<br>(68.7)   |
| SRH≥85mm <sup>2</sup> <155mm <sup>2</sup> | 51  | 37   | 125.9 ± 20.3<br>(125.3) | 0   | 0.0  | /                       | 24  | 25.3 | 127.9 ± 21.6<br>(136.1) | 0   | 0.0  | /                       | 75   | 31.3 | 126.6 ± 20.6<br>(131.3) |
| SRH≥155mm <sup>2</sup>                    | 78  | 56.5 | 196.7 ± 31.9<br>(190.7) | 5   | 100  | 212.1 ± 41.4<br>(195.3) | 60  | 63.2 | 199.2 ± 29.3<br>(199.1) | 1   | 50.0 | 194.3 ± //<br>(194.3)   | 144  | 60.0 | 198.3 ± 31<br>(194.3)   |
| Midi-Pyrénées                             | 233 |      |                         | 19  |      |                         | 45  |      |                         | 2   |      |                         | 299  |      |                         |
| SRH=0mm <sup>2</sup>                      | 20  | 5.6  |                         | 5   | 26.3 |                         | 2   | 4.4  |                         | 0   | 0.0  | /                       | 20   | 6.7  |                         |
| SRH<85mm <sup>2</sup> ≠ 0mm <sup>2</sup>  | 21  | 6.9  | 60.5 ± 19<br>(69.4)     | 1   | 5.3  | 71.2 ± //<br>(71.2)     | 4   | 8.9  | 43.2 ± 23<br>(36.7)     | 0   | 0.0  | /                       | 21   | 7.0  | 57.7 ± 20.2<br>(69.3)   |
| SRH≥85mm <sup>2</sup> <155mm <sup>2</sup> | 94  | 33   | 127.6 ± 18.4<br>(131.9) | 4   | 21.1 | 109.8 ± 23.4<br>(101)   | 12  | 26.7 | 132.7 ± 17.7<br>(133.5) | 0   | 0.0  | /                       | 94   | 31.4 | 127.3 ± 18.9<br>(131.1) |
| SRH≥155mm <sup>2</sup>                    | 164 | 54.5 | 184.9 ± 20.5<br>(180.7) | 9   | 47.4 | 190.6 ± 23.1<br>(190.9) | 27  | 60.0 | 193 ± 23.4<br>(187.7)   | 2   | 100  | 211.5 ± 2.9<br>(211.5)  | 164  | 54.8 | 186.9 ± 21.3<br>(183)   |
| Overall                                   | 940 |      |                         | 476 |      |                         | 707 |      |                         | 522 |      |                         | 2645 |      |                         |
| SRH=0mm <sup>2</sup>                      | 29  | 3.1  |                         | 22  | 4.6  |                         | 51  | 7.2  |                         | 88  | 16.9 |                         | 190  | 7.2  |                         |
| SRH<85mm <sup>2</sup> ≠ 0mm <sup>2</sup>  | 34  | 3.6  | 61.8 ± 17.5<br>(64.2)   | 12  | 2.5  | 51.1 ± 16.9<br>(50.7)   | 48  | 6.8  | 57.2 ± 17.7<br>(58.3)   | 44  | 8.4  | 56.2 ± 16.8<br>(56.1)   | 138  | 5.2  | 57.5 ± 17.4<br>(58.8)   |
| SRH≥85mm <sup>2</sup> <155mm <sup>2</sup> | 275 | 25.6 | 130.5 ± 18.2<br>(134.6) | 128 | 25.6 | 128.8 ± 20.1<br>(135.3) | 179 | 22.1 | 126.9 ± 20.2<br>(130.1) | 139 | 23.2 | 124.3 ± 17.6<br>(127.1) | 721  | 27.3 | 128.1 ± 19.1<br>(131.5) |
| SRH≥155mm <sup>2</sup>                    | 602 | 64   | 192.7 ± 26.4<br>(188.5) | 314 | 66.5 | 192.5 ± 27.9<br>(187.8) | 429 | 60.7 | 198.3 ± 29<br>(194.3)   | 251 | 48.1 | 196.5 ± 29.9<br>(191.4) | 1596 | 60.3 | 194.8 ± 28<br>(190.2)   |
