# Supplementary material for: Success and Limitation of Equine Influenza Vaccination: The First Incursion in a Decade of a Florida Clade 1 Equine Influenza Virus that Shakes Protection Despite High Vaccine Coverage
Source: MDPI journal article supplement (doi:10.3390/vaccines7040174), 2019-11-02

# Success and limitation of equine influenza vaccination: the first incursion of a decade of a Florida Clade 1 equine influenza virus that shakes protection despite high vaccine coverage.

Stéphanie Fougerolle *et al.* Vaccines.

**Supplementary Figure S1:** Number of breeding centers per French region in 2017, all equids considered (race & sport horses, ponies, heavy horses and donkeys).

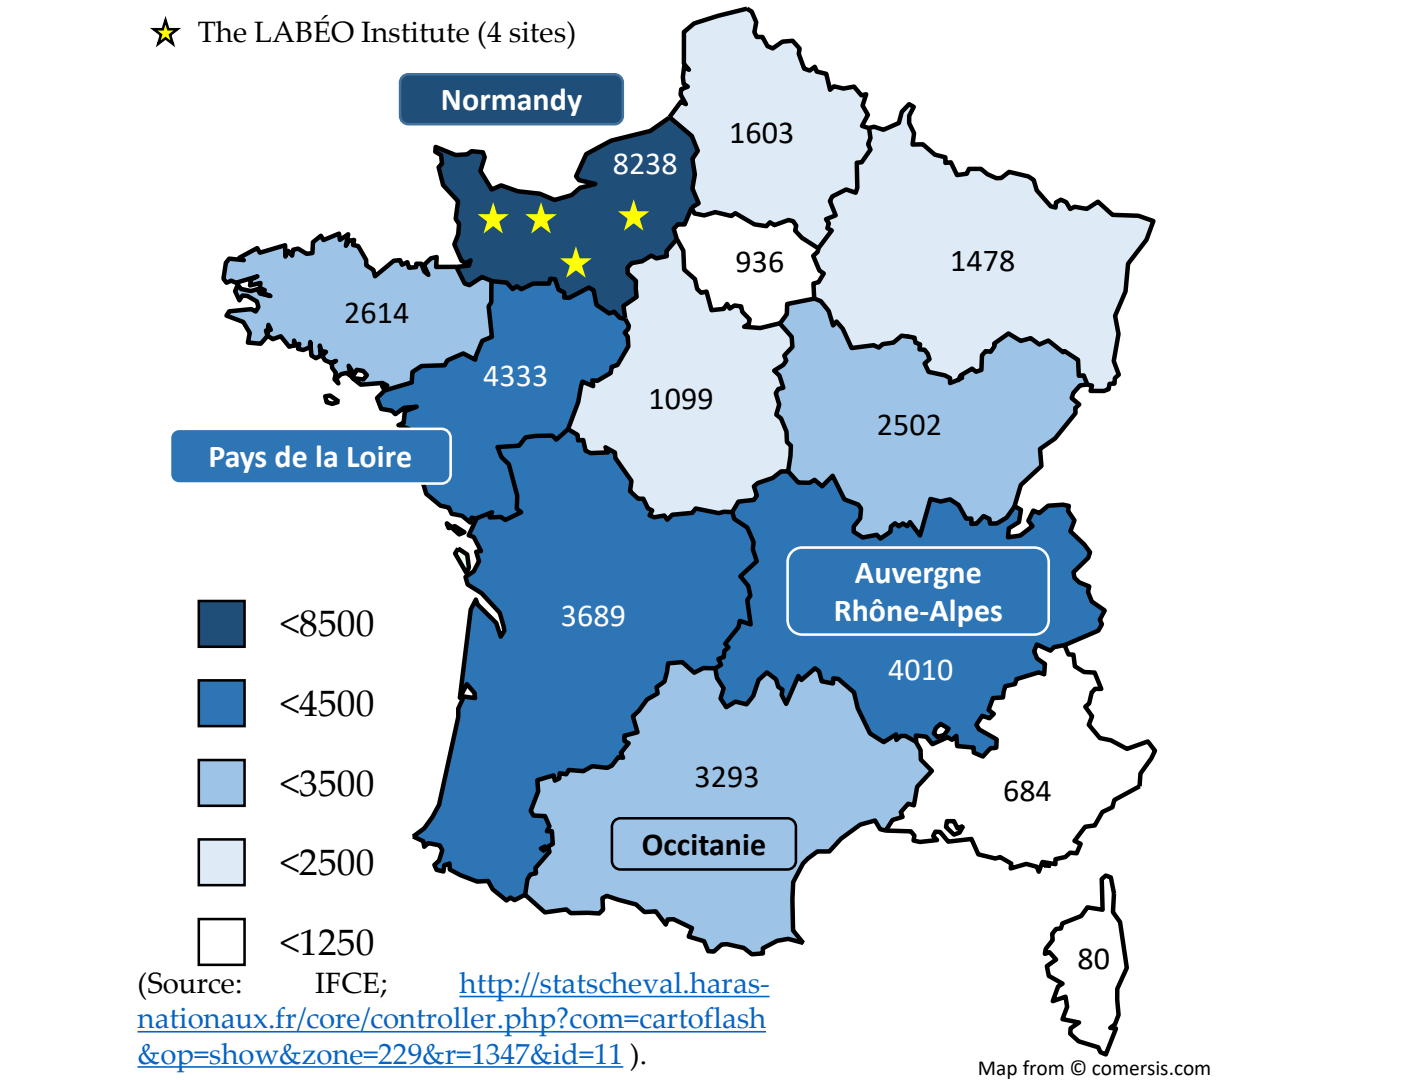

SRH results adjusted to take into account the number of breeding center per region (i.e. to balance the weight of the Normandy region results).

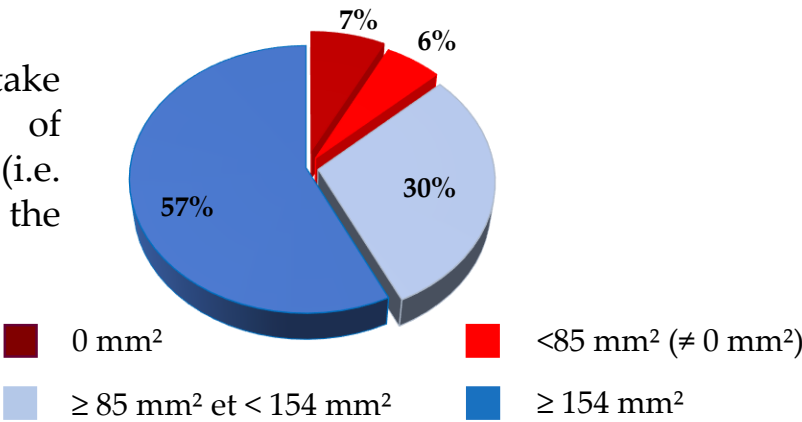

Supplement: s1 [file s1]
