# Supplementary material for: Success and Limitation of Equine Influenza Vaccination: The First Incursion in a Decade of a Florida Clade 1 Equine Influenza Virus that Shakes Protection Despite High Vaccine Coverage
Source: MDPI journal article supplement (doi:10.3390/vaccines7040174), 2019-11-02
Supplement: s1 [file s1]

**Success and limitation of equine influenza vaccination: the first incursion in a decade of a Florida Clade 1 equine influenza virus that shakes protection despite high vaccine coverage.**  
Stéphanie Fougérolle *et al.* Vaccines.

**Supplementary Table S2: HA amino acid alignment.**

|                           |                                                                                                         |                    |     |     |     |     |     |     |     |     |     |
|---------------------------|---------------------------------------------------------------------------------------------------------|--------------------|-----|-----|-----|-----|-----|-----|-----|-----|-----|
|                           | 1                                                                                                       | 10                 | 20  | 30  | 40  | 50  | 60  | 70  | 80  | 90  | 100 |
| A/eq/Ohio/1/2003          | SQNPISGNNTATLCLGHHAVANGTLVKTISDDQIEVTNATELVQSISMKGICNNSYRILDGRNCTLIDAMLGDPHCDAFQYENWDLFIERSSAFSNCYPY    |                    |     |     |     |     |     |     |     |     |     |
| A/eq/South Africa/4/2003  | .....P.....KD.....                                                                                      |                    |     |     |     |     |     |     |     |     |     |
| A/eq/East Lothian/1/2018  | .....ND.....                                                                                            | P.....KD.....      |     |     |     |     |     |     |     |     |     |
| A/eq/Santiago/TT3A/2018   | .....ND.....                                                                                            | P.....KD.....      |     |     |     |     |     |     |     |     |     |
| A/eq/Concepcion/RO6C/2018 | .....ND.....                                                                                            | P.....KD.....      |     |     |     |     |     |     |     |     |     |
| A/eq/Paris/1/2018         | .....ND.....                                                                                            | P.....KD.....      |     |     |     |     |     |     |     |     |     |
| A/eq/Pas-de-Calais/1/2018 | .....ND.....                                                                                            | P.....KD.....      |     |     |     |     |     |     |     |     |     |
| A/eq/Ardennes/1/2018      | .....ND.....                                                                                            | P.....KD.....      |     |     |     |     |     |     |     |     |     |
| A/eq/Calvados/1/2019      | .....ND.....                                                                                            | P.....KD.....      |     |     |     |     |     |     |     |     |     |
| A/eq/Orne/1/2019          | .....ND.....                                                                                            | P.....KD.....      |     |     |     |     |     |     |     |     |     |
|                           | 101                                                                                                     | 110                | 120 | 130 | 140 | 150 | 160 | 170 | 180 | 190 | 200 |
| A/eq/Ohio/1/2003          | DIPDYASLRSIVASSGTLLEFTAEGFTWTGVTQNGRSGACKRGSADSFSSRLNWLTKSGSSYPTLNVTMPNNKNFDFKLYIWGIHHPPSSNQEQTKLYIQESG |                    |     |     |     |     |     |     |     |     |     |
| A/eq/South Africa/4/2003  | .....                                                                                                   |                    |     |     |     |     |     |     |     |     |     |
| A/eq/East Lothian/1/2018  | ..N.....                                                                                                | S.....T.....       |     |     |     |     |     |     |     |     |     |
| A/eq/Santiago/TT3A/2018   | ..N.....                                                                                                | S.....T.....       |     |     |     |     |     |     |     |     |     |
| A/eq/Concepcion/RO6C/2018 | ..N.....                                                                                                | S.....T.....       |     |     |     |     |     |     |     |     |     |
| A/eq/Paris/1/2018         | ..N.....                                                                                                | S.....I.....T..... |     |     |     |     |     |     |     |     |     |
| A/eq/Pas-de-Calais/1/2018 | ..N.....                                                                                                | S.....I.....T..... |     |     |     |     |     |     |     |     |     |
| A/eq/Ardennes/1/2018      | ..N.....                                                                                                | S.....I.....T..... |     |     |     |     |     |     |     |     |     |
| A/eq/Calvados/1/2019      | ..N.....                                                                                                | S.....I.....T..... |     |     |     |     |     |     |     |     |     |
| A/eq/Orne/1/2019          | ..N.....                                                                                                | S.....I.....T..... |     |     |     |     |     |     |     |     |     |
|                           | 201                                                                                                     | 210                | 220 | 230 | 240 | 250 | 260 | 270 | 280 | 290 | 300 |
| A/eq/Ohio/1/2003          | RVTVSTKRSQQTIIPNIGSRPWVRGQSGRISYIYWTIVKPGDILMINSNGNLVAPRGYFKLKTGKSSVMRSDVPIDICVSECITPNGSISNDKPFQNVNKV   |                    |     |     |     |     |     |     |     |     |     |
| A/eq/South Africa/4/2003  | .....                                                                                                   |                    |     |     |     |     |     |     |     |     |     |
| A/eq/East Lothian/1/2018  | .....I.....                                                                                             |                    |     |     |     |     |     |     |     |     |     |
| A/eq/Santiago/TT3A/2018   | .....I.....                                                                                             |                    |     |     |     |     |     |     |     |     |     |
| A/eq/Concepcion/RO6C/2018 | .....I.....                                                                                             |                    |     |     |     |     |     |     |     |     |     |
| A/eq/Paris/1/2018         | .....I.....                                                                                             |                    |     |     |     |     |     |     |     |     |     |
| A/eq/Pas-de-Calais/1/2018 | .....I.....                                                                                             |                    |     |     |     |     |     |     |     |     |     |
| A/eq/Ardennes/1/2018      | .....I.....                                                                                             |                    |     |     |     |     |     |     |     |     |     |
| A/eq/Calvados/1/2019      | .....I.....                                                                                             |                    |     |     |     |     |     |     |     |     |     |
| A/eq/Orne/1/2019          | .....I.....                                                                                             |                    |     |     |     |     |     |     |     |     |     |
|                           | 301                                                                                                     | 310                | 320 | 330 | 340 | 350 | 360 | 370 | 380 | 390 | 400 |
| A/eq/Ohio/1/2003          | TYGKCPKYIRQNTLKLATGMRNVPEKQIRGIFGAIAGFIENGWEGMVDGWYGFYQNSEGTGQAADLKSTQAAIDQINGKLN RVIERTNEKFHQIEKEFS    |                    |     |     |     |     |     |     |     |     |     |
| A/eq/South Africa/4/2003  | -----                                                                                                   |                    |     |     |     |     |     |     |     |     |     |
| A/eq/East Lothian/1/2018  | .....                                                                                                   |                    |     |     |     |     |     |     |     |     |     |
| A/eq/Santiago/TT3A/2018   | .....                                                                                                   |                    |     |     |     |     |     |     |     |     |     |
| A/eq/Concepcion/RO6C/2018 | .....                                                                                                   |                    |     |     |     |     |     |     |     |     |     |
| A/eq/Paris/1/2018         | .....T.....                                                                                             |                    |     |     |     |     |     |     |     |     |     |
| A/eq/Pas-de-Calais/1/2018 | .....T.....                                                                                             |                    |     |     |     |     |     |     |     |     |     |
| A/eq/Ardennes/1/2018      | .....T.....                                                                                             |                    |     |     |     |     |     |     |     |     |     |
| A/eq/Calvados/1/2019      | .....T.....                                                                                             |                    |     |     |     |     |     |     |     |     |     |
| A/eq/Orne/1/2019          | .....T.....                                                                                             |                    |     |     |     |     |     |     |     |     |     |
|                           | 401                                                                                                     | 410                | 420 | 430 | 440 | 450 | 460 | 470 | 480 | 490 | 500 |
| A/eq/Ohio/1/2003          | EVEGRIQDLEKYVEDTKIDLWSYNAELLVALENQHTIDLTDAEMNKLFEKTRRQLRENAEDMGGGCFKIYHKCDNACIGSIRNGTYDHYIYRDEALNNRF    |                    |     |     |     |     |     |     |     |     |     |
| A/eq/South Africa/4/2003  | -----                                                                                                   |                    |     |     |     |     |     |     |     |     |     |
| A/eq/East Lothian/1/2018  | .....R..L.....N.....                                                                                    |                    |     |     |     |     |     |     |     |     |     |
| A/eq/Santiago/TT3A/2018   | .....G..L.....N.....                                                                                    |                    |     |     |     |     |     |     |     |     |     |
| A/eq/Concepcion/RO6C/2018 | .....R..L.....N.....                                                                                    |                    |     |     |     |     |     |     |     |     |     |
| A/eq/Paris/1/2018         | .....R..L.....N.....                                                                                    |                    |     |     |     |     |     |     |     |     |     |
| A/eq/Pas-de-Calais/1/2018 | .....R..L.....N.....                                                                                    |                    |     |     |     |     |     |     |     |     |     |
| A/eq/Ardennes/1/2018      | .....R..L.....N.....                                                                                    |                    |     |     |     |     |     |     |     |     |     |
| A/eq/Calvados/1/2019      | .....R..L.....N.....                                                                                    |                    |     |     |     |     |     |     |     |     |     |
| A/eq/Orne/1/2019          | .....R..L.....N.....                                                                                    |                    |     |     |     |     |     |     |     |     |     |
|                           | 501                                                                                                     | 510                | 520 | 530 | 540 | 550 |     |     |     |     |     |
| A/eq/Ohio/1/2003          | QIKGVELKSGYKDWILWISFAISCFLICVVLLGFIMWACQKGNIRCNICI                                                      |                    |     |     |     |     |     |     |     |     |     |
| A/eq/South Africa/4/2003  | -----                                                                                                   |                    |     |     |     |     |     |     |     |     |     |
| A/eq/East Lothian/1/2018  | .....                                                                                                   |                    |     |     |     |     |     |     |     |     |     |
| A/eq/Santiago/TT3A/2018   | .....                                                                                                   |                    |     |     |     |     |     |     |     |     |     |
| A/eq/Concepcion/RO6C/2018 | .....                                                                                                   |                    |     |     |     |     |     |     |     |     |     |
| A/eq/Paris/1/2018         | .....                                                                                                   |                    |     |     |     |     |     |     |     |     |     |
| A/eq/Pas-de-Calais/1/2018 | .....                                                                                                   |                    |     |     |     |     |     |     |     |     |     |
| A/eq/Ardennes/1/2018      | .....                                                                                                   |                    |     |     |     |     |     |     |     |     |     |
| A/eq/Calvados/1/2019      | .....                                                                                                   |                    |     |     |     |     |     |     |     |     |     |
| A/eq/Orne/1/2019          | .....                                                                                                   |                    |     |     |     |     |     |     |     |     |     |
